# Supplementary material for: A Complex Genomic Rearrangement Resulting in Loss of Function of SCN1A and SCN2A in a Patient with Severe Developmental and Epileptic Encephalopathy
Source: MDPI journal article supplement (doi:10.3390/ijms232112900), 2022-10-26
Supplement: s1 [file s1]

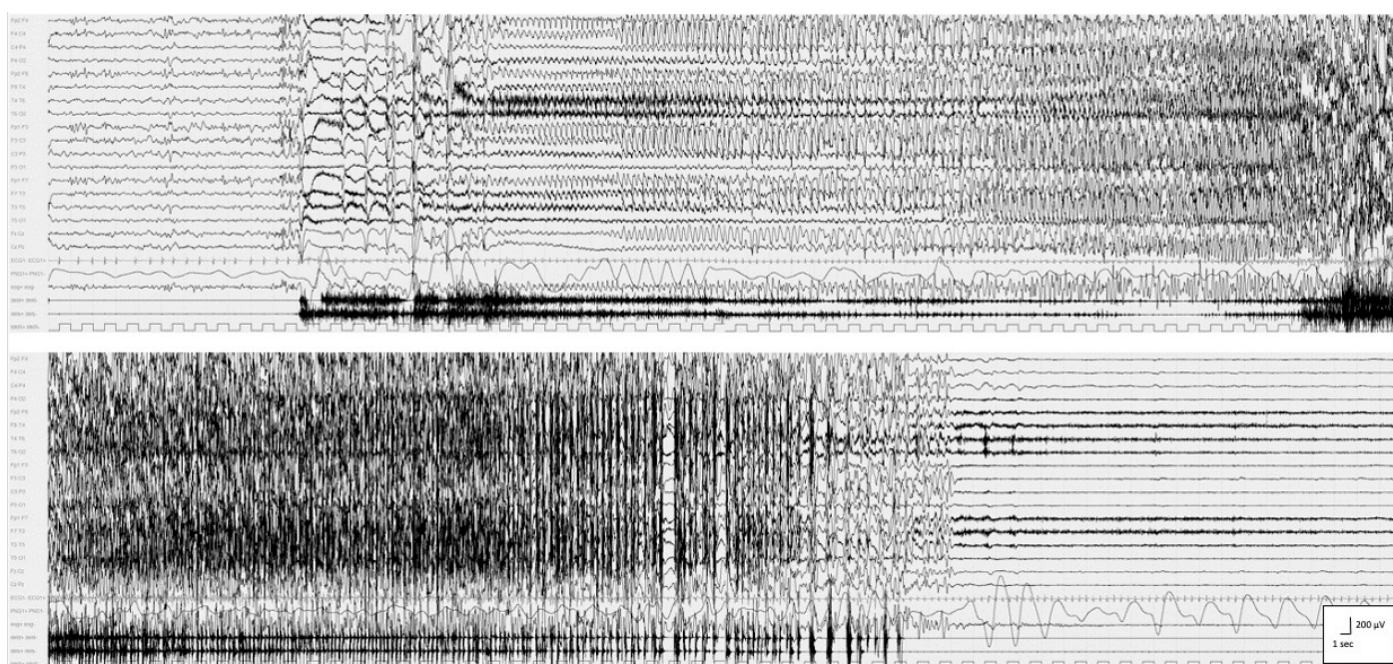

**Figure S1.** Ictal video-polygraphic recording of patient at the age of 5 years. The ictal discharge starts with a diffuse low-voltage fast activity, increasing in amplitude and decreasing in frequency, bilateral and symmetrical. Seizure ends after 90 seconds with intravenous midazolam administration and is followed by a post-ictal suppression of brain electrical activity (Post-Ictal Generalized EEG, PGES). Clinically: abrupt and massive tonic contraction with flushing of the face and trunk, followed by bilateral tonic-clonic contraction of upper and lower limbs 50 seconds after its beginning.
